# Supplementary material
Source: PubMed Central journal article supplement (PMC4261194)
Supplement: NIHMS646323-supplement-P13_Supplementary_Data.pdf [file NIHMS646323-supplement-P13_Supplementary_Data.pdf]

# Minimizing acylation of peptides in PLGA microspheres

Ying Zhang<sup>a</sup> and Steven P Schwendeman\*

Department of Pharmaceutical Sciences, University of Michigan  
428 Church Street, Ann Arbor, MI 48109-1065, USA

\* Corresponding author. Tel: +1-734-615-6574; Fax: + 1-734-615-6162

*Email address:* [schwende@umich.edu](mailto:schwende@umich.edu) (S.P. Schwendeman)

<sup>a</sup> current address: 3M Drug Delivery Systems Division, St. Paul, MN, 55144

## Supporting information

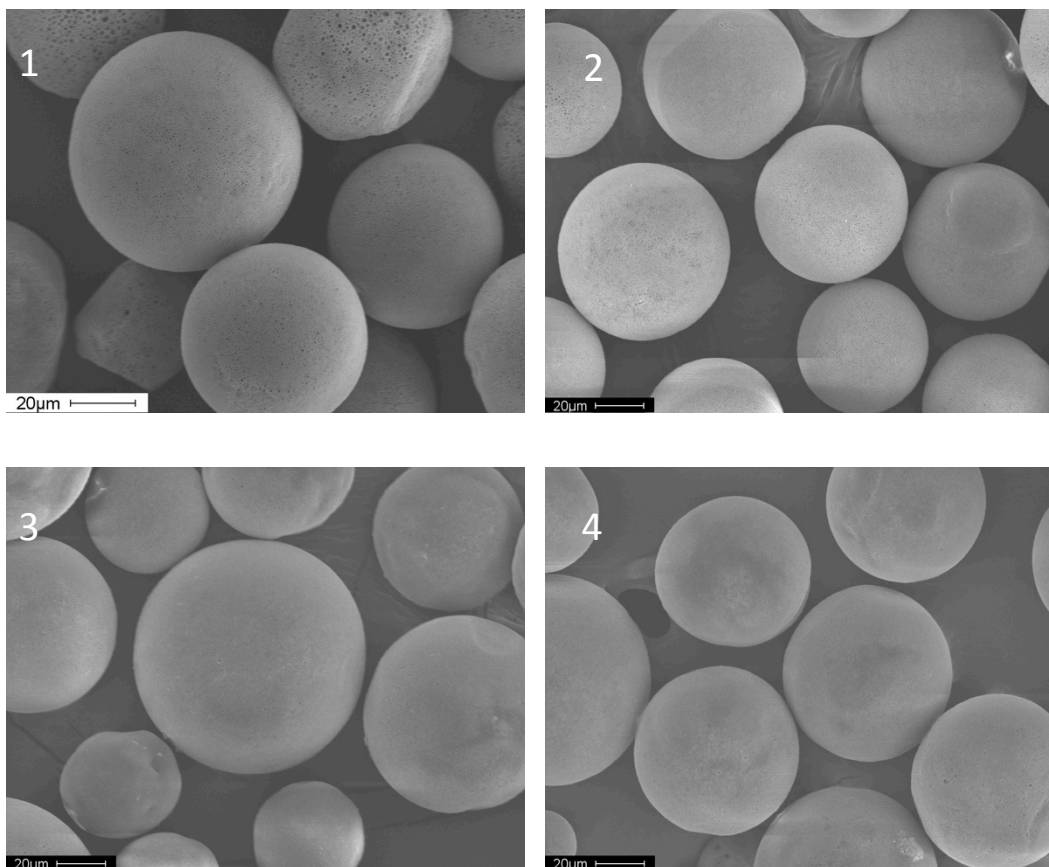

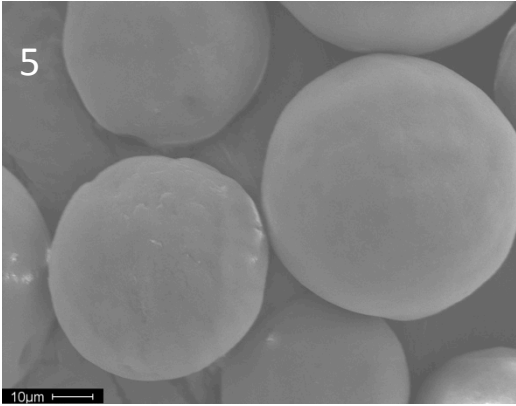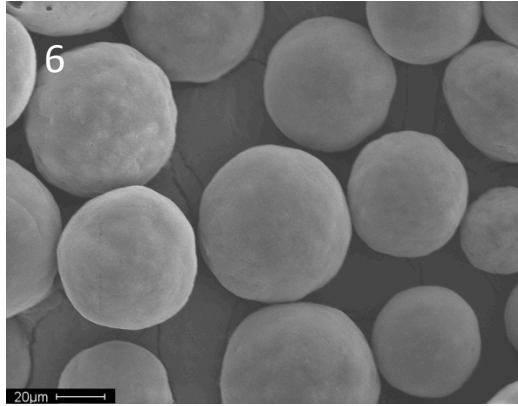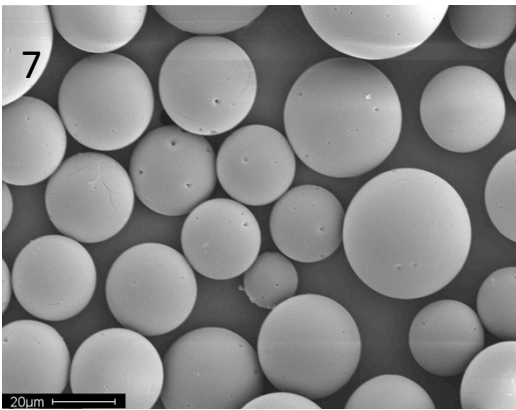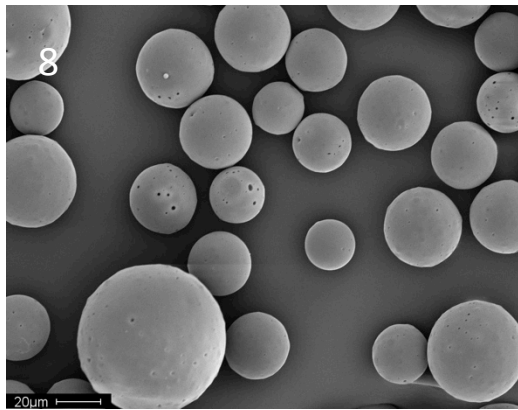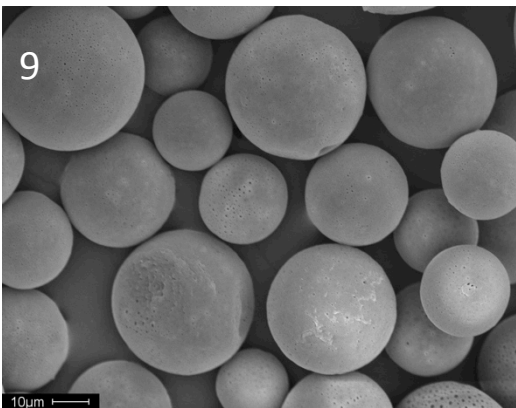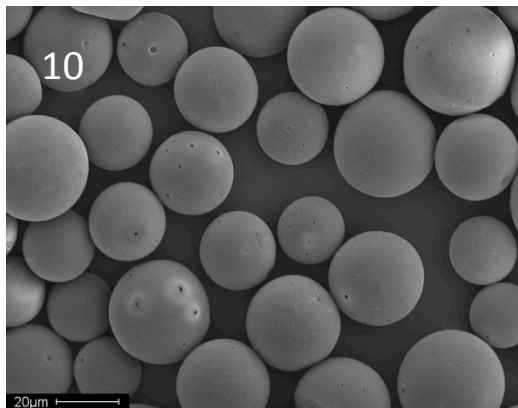

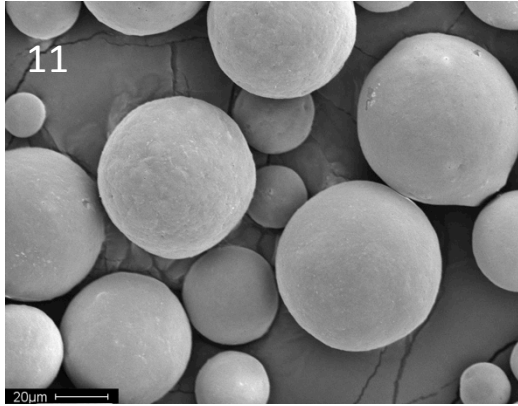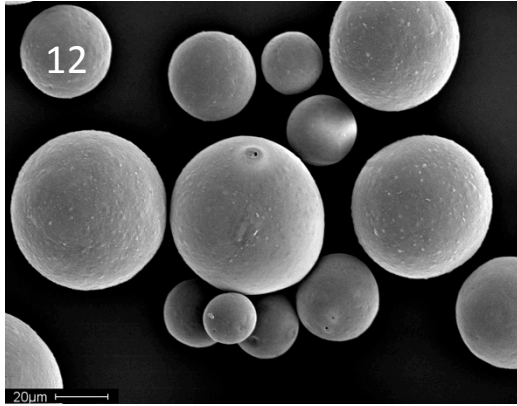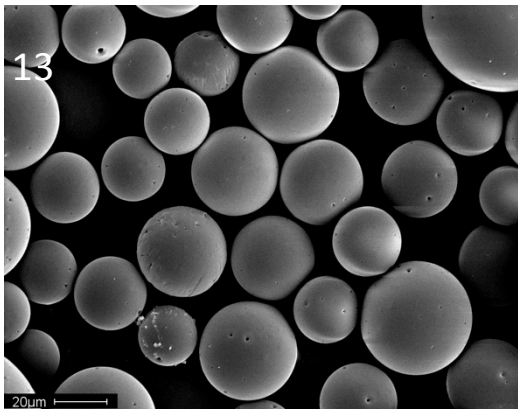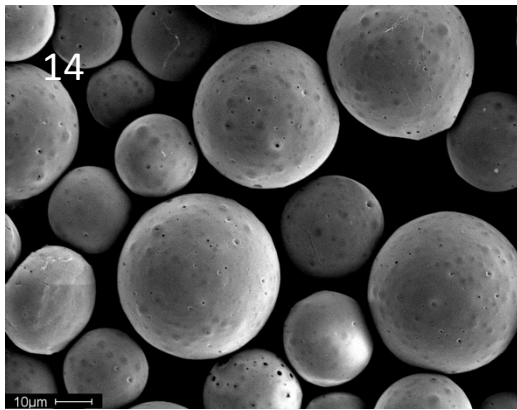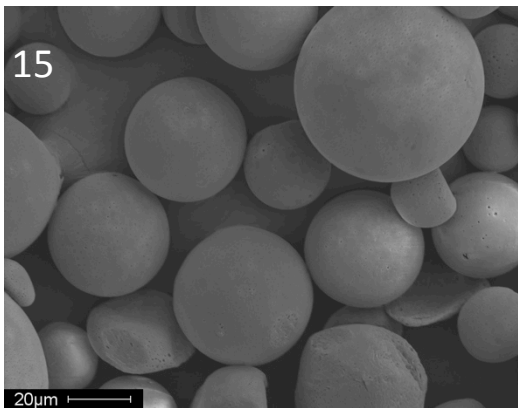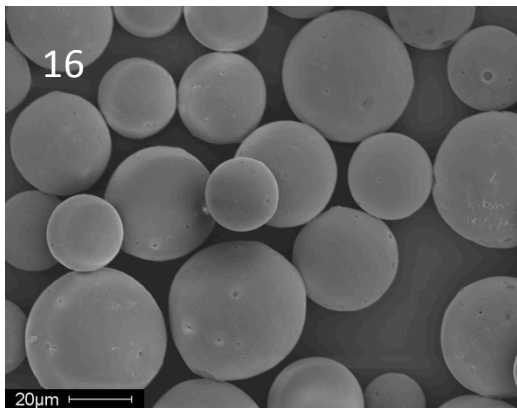

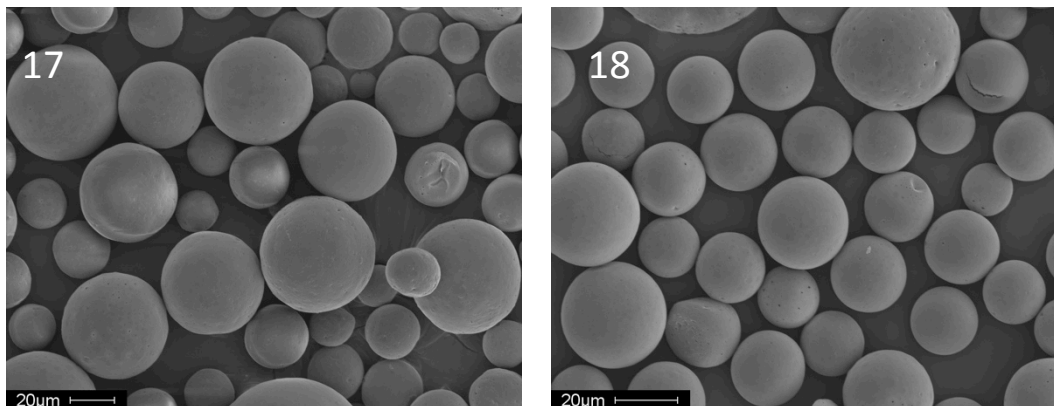

Figure S1. Morphology of peptide-PLGA microspheres with or without excipients, formulation 1-18, as recorded by scanning electron microscopy.

Table S1. Observed molecular masses by MALDI-TOF analysis of salmon calcitonin (sCT) and human parathyroid hormone (hPTH) and their impurities recovered from PLGA millicylinders incubated in 97% RH and 37 °C for 21 days.

| Observed mass (Da) | Expected Peptide                      |
|--------------------|---------------------------------------|
| 3434.0             | sCT                                   |
| 3456.1             | sCT-Na <sup>+</sup>                   |
| 3492.6             | sCT-GA                                |
| 3506.1             | sCT-LA                                |
| 3550.0             | sCT-2GA                               |
| 3564.4             | sCT-LA-GA                             |
| 3578.9             | sCT-2LA                               |
| 4118.9, 4118.3     | hPTH <sub>1-34</sub>                  |
| 4139.0             | hPTH <sub>1-34</sub> -Na <sup>+</sup> |
| 4177.2             | hPTH <sub>1-34</sub> -GA              |
| 4191.1             | hPTH <sub>1-34</sub> -LA              |
| 4249.6             | hPTH <sub>1-34</sub> -LA-GA           |

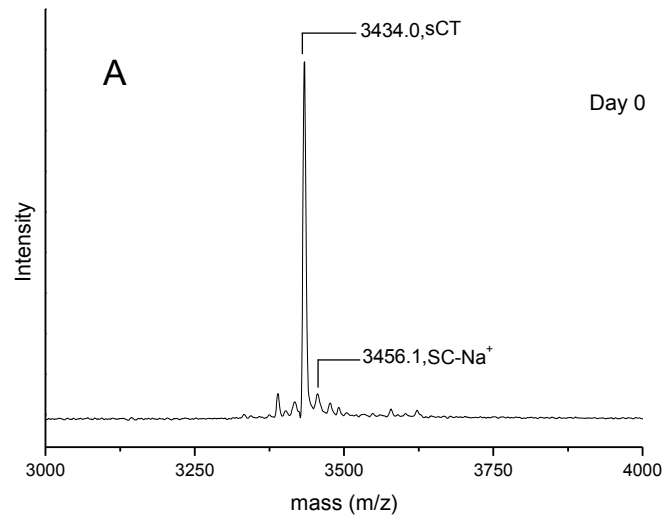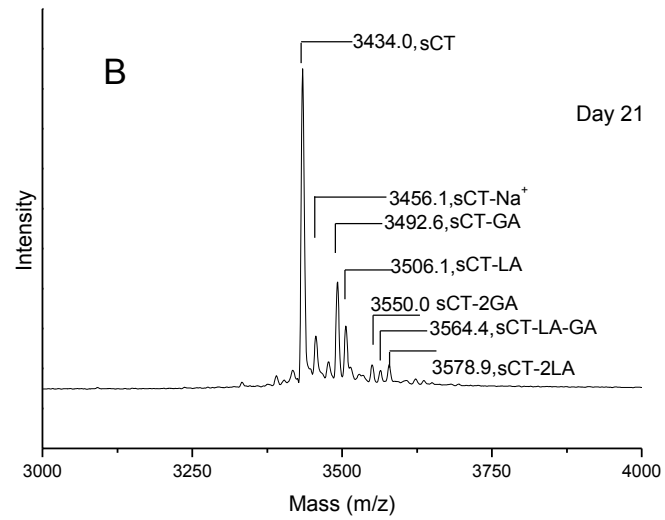

Figure S2. MALDI-TOF MS of sCT and its acylation products inside millicylinders incubated for 0 (A) and 21 days (B) at 97% RH and 37 °C

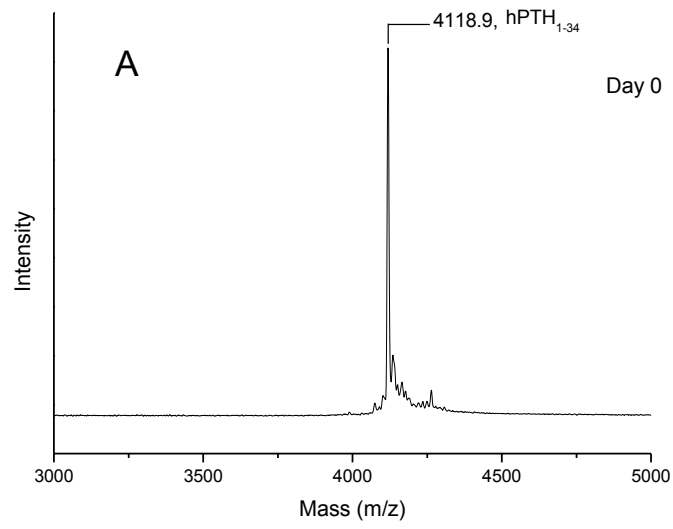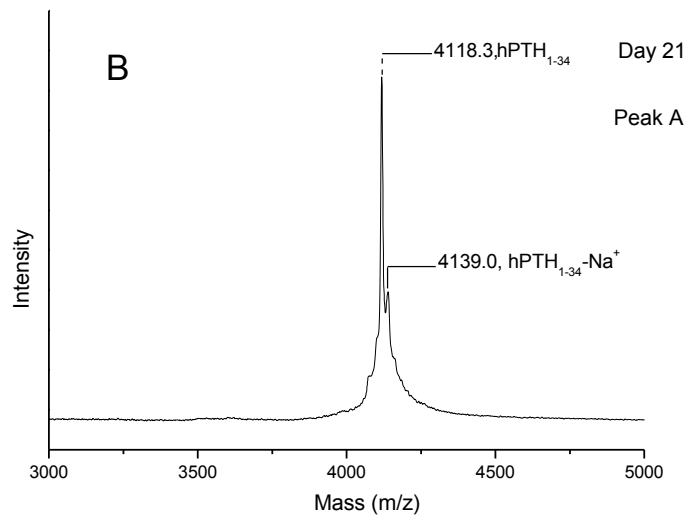

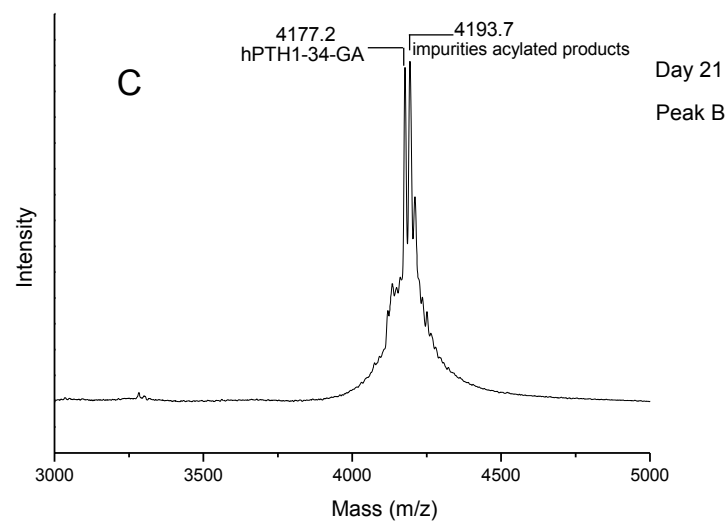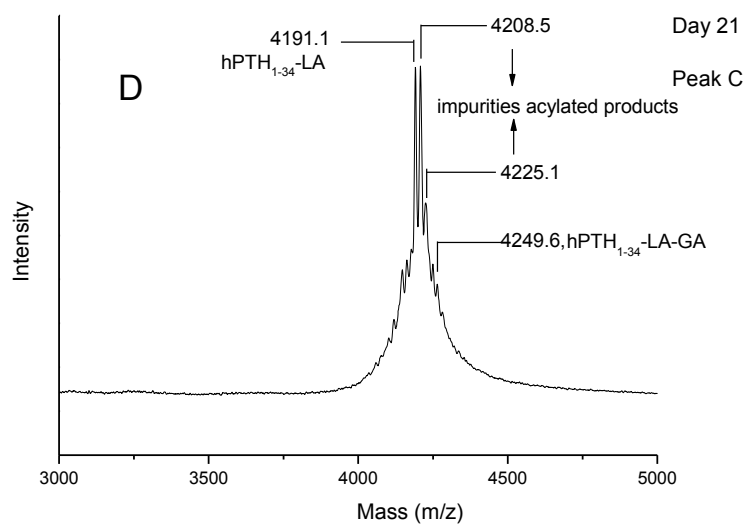

Figure S3. MALDI-TOF MS of hPTH and its acylation products inside millicylinders incubated for 0 (A) and 21 days (B, C and D) at 97% RH and 37 °C

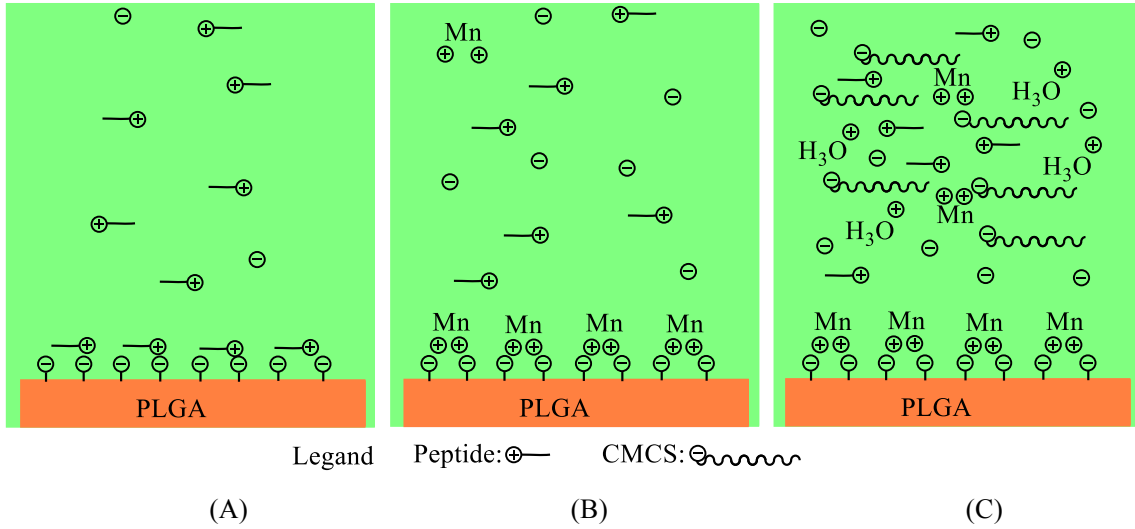

Figure S4. Proposed potential mechanisms to explain stabilization of peptide by divalent cations and CMCS. Peptide adsorption and acylation (A); acylation is inhibited by blocking peptide from combining with negative sites in PLGA (B); acylation is inhibited by increasing peptide partitioning in a swollen CMCS/divalent cation phase(C)
